# Supplementary material for: Antibiotic exposure in pregnancy and risk of coeliac disease in offspring: a cohort study
Source: PubMed Central journal article supplement (PMC4021104; doi:10.1186/1471-230x-14-75), 2014-04-14
Supplement: 1471-230X-14-75-S1.pdf [file 1471-230X-14-75-S1.pdf]

## Additional file.

**Table A1. Risk of coeliac disease according to the child's use of antibiotics in the first year of life. Hazard ratios (HR) estimated through Cox regression.**

| Child's use of antibiotics in the first year of life | Crude HR; 95% CI |
|------------------------------------------------------|------------------|
| No use                                               | Reference        |
| 1-2 courses                                          | 1.47; 0.75-2.88  |
| 3-5 courses                                          | 1.80; 0.54-6.05  |
| ≥6 courses                                           | NE               |

NE, not estimated because of lack of events
